# Supplementary material for: i-CONTENT tool for assessing therapeutic quality of exercise programs employed in randomised clinical trials
Source: PubMed Central journal article supplement — Br J Sports Med. 2020 Nov 3;55(20):1153–60. doi: 10.1136/bjsports-2019-101630 (PMC8479742; doi:10.1136/bjsports-2019-101630), 2020-11-03
Supplement: bjsports-2019-101630supp001.pdf [file bjsports-2019-101630supp001.pdf]

**Appendix 1.** All sixty-one items that were elicited in the Delphi study including the scores from the third Delphi panel.

|                                                                                                                                                                                                            | Median | 25 percentile | 75 percentile |
|------------------------------------------------------------------------------------------------------------------------------------------------------------------------------------------------------------|--------|---------------|---------------|
| <b>It is essential for the potential effectiveness of a therapeutic exercise program:</b>                                                                                                                  |        |               |               |
| 1. to be based on a plausible rationale                                                                                                                                                                    | 6      | 6             | 7             |
| 2. to be based on a-priori aims and intentions                                                                                                                                                             | 6      | 5             | 7             |
| 3. to have a rationale for the mode of exercise                                                                                                                                                            | 6      | 6             | 7             |
| 4. to have a rationale for each individual exercise                                                                                                                                                        | 6      | 5             | 6             |
| 5. to have a rationale for the dosage of the exercise program                                                                                                                                              | 7      | 6             | 7             |
| 6. to have anatomical, physiological, psychological and behavioral relevance to the injury/condition in question                                                                                           | 7      | 6             | 7             |
| <b>A rationale can be based on physiological principles, a plausible theory based on good clinical reasoning or scientific evidence (either fundamental or experimental).</b>                              |        |               |               |
| 7. Do you agree with this definition for rationale?                                                                                                                                                        | 6      | 6             | 7             |
| <b>It is essential for the potential effectiveness of a therapeutic exercise program:</b>                                                                                                                  |        |               |               |
| 8. to present rules/algorithms for treatment selection over the course of the study based on operationally defined criteria.                                                                               | 5      | 4             | 6             |
| 9. that the content of the exercise program is related to the goals to achieve.                                                                                                                            | 7      | 6             | 7             |
| 10. to be supervised.                                                                                                                                                                                      | 5      | 3             | 6             |
| 11. to be personalized to the patient.                                                                                                                                                                     | 6      | 5             | 7             |
| 12. to be contextualized to the patient                                                                                                                                                                    | 6      | 5             | 7             |
| 13. that patients were involved in its development.                                                                                                                                                        | 5      | 4             | 6             |
| 14. to target the cause of the problem.                                                                                                                                                                    | 6      | 5             | 7             |
| 15. to target impairments or functional limitations.                                                                                                                                                       | 6      | 5             | 7             |
| 16. to have the potential to achieve the identified goals.                                                                                                                                                 | 7      | 6             | 7             |
| 17. to include the transfer of required skills to daily practice.                                                                                                                                          | 6      | 5             | 7             |
| 18. to take behavior compensation as a result of the therapy into account (e.g. does the person adapt their normal daily behaviors as a result of the therapy - either in a positive or negative fashion). | 6      | 5             | 6             |
| <b>It is essential for the potential effectiveness of a therapeutic exercise program:</b>                                                                                                                  |        |               |               |
| 19. that its dosage is in accordance with its goals.                                                                                                                                                       | 6      | 5             | 7             |
| 20. that the mode of exercise is in line with the purpose of the exercise program.                                                                                                                         | 6      | 6             | 7             |
| 21. that the exercise program lasts at least 6 weeks.                                                                                                                                                      | 4      | 2             | 6             |

**It is essential for the potential effectiveness of a therapeutic exercise program:**

|                                                                                |   |   |   |
|--------------------------------------------------------------------------------|---|---|---|
| 22. to yield only minimal adverse events.                                      | 6 | 6 | 7 |
| 23. to be ethically sound.                                                     | 7 | 7 | 7 |
| 24. to be carried out under usual conditions, rather than research conditions. | 5 | 4 | 6 |
| 25. to be durable in clinical practice.                                        | 6 | 5 | 7 |
| 26. to be easily disseminated.                                                 | 6 | 5 | 6 |
| 27. to be easily realized for patients.                                        | 6 | 5 | 7 |
| 28. to be standardized.                                                        | 5 | 4 | 6 |
| 29. to be feasible in most settings.                                           | 5 | 5 | 6 |
| 30. to be economically viable and sustainable.                                 | 5 | 5 | 6 |
| 31. to be suitable for the majority of patients in the population.             | 5 | 4 | 6 |

**It is essential for the potential effectiveness of a therapeutic exercise program:**

|                                                                                                                                                            |   |   |   |
|------------------------------------------------------------------------------------------------------------------------------------------------------------|---|---|---|
| 32. that therapy adherence is adequate                                                                                                                     | 6 | 6 | 7 |
| 33. that patients whom adherence is inadequate - determined by use of predetermined cut-off scores - are deleted from the study.                           | 3 | 2 | 4 |
| 34. that progression in the exercise program is demonstrated (eg. patients showed an increased across the trial in the weight lifted, minutes walked etc). | 6 | 5 | 7 |

**It is essential for the potential effectiveness of a therapeutic exercise program:**

|                                                                                                                                                  |   |   |   |
|--------------------------------------------------------------------------------------------------------------------------------------------------|---|---|---|
| 35. that the severity of injury/condition is considered in the in- and exclusion criteria.                                                       | 6 | 5 | 6 |
| 36. that measures such as fitness level, habitual physical activity and/or sedentary behaviors are considered in the in- and exclusion criteria. | 5 | 4 | 6 |
| 37. that measures such as comorbidities, age, and sex are considered in the in- and exclusion criteria.                                          | 6 | 5 | 6 |
| 38. that measures such as maturation, growth and development are considered in the in- and exclusion criteria.                                   | 5 | 4 | 6 |
| 39. that the eligibility criteria select patients that are common in clinical practice.                                                          | 6 | 5 | 6 |
| 40. that the eligibility criteria select patients that are in need of treatment.                                                                 | 6 | 6 | 7 |
| 41. to match the goal of the therapeutic exercise to the patients problems.                                                                      | 6 | 6 | 7 |

**It is essential for the potential effectiveness of a therapeutic exercise program:**

|                                                                                                                                                              |   |   |   |
|--------------------------------------------------------------------------------------------------------------------------------------------------------------|---|---|---|
| 42. that, in case the exercise program is supervised, the supervisor's competences and skills are matched to the goals and content of the program.           | 6 | 6 | 7 |
| <b>It is essential for the potential effectiveness of a therapeutic exercise program:</b>                                                                    |   |   |   |
| 43. that the outcome evaluation is performed at least 3 months after the exercise intervention.                                                              | 5 | 4 | 6 |
| 44. that the outcome evaluation is performed at least 6 months after the exercise intervention.                                                              | 5 | 4 | 6 |
| 45. that the primary outcomes of the exercise program should be patient-related.                                                                             | 6 | 5 | 7 |
| 46. that the outcome measures reflect the goals of the intervention.                                                                                         | 7 | 6 | 7 |
| 47. that outcomes are assessed with validated performance measures.                                                                                          | 7 | 6 | 7 |
| 48. that outcomes are assessed during the intervention                                                                                                       | 5 | 3 | 6 |
| 49. that outcomes are assessed directly after the intervention                                                                                               | 6 | 6 | 7 |
| 50. that outcomes are assessed a medium time after the intervention                                                                                          | 6 | 5 | 7 |
| 51. that outcomes are assessed a long time after the intervention                                                                                            | 6 | 5 | 7 |
| 52. that timing of the outcome assessment is based on the predicted washout period of the exercise program.                                                  | 5 | 4 | 6 |
| <b>It is essential for the potential effectiveness of a therapeutic exercise program:</b>                                                                    |   |   |   |
| 53. that the exercise program contains outcome measurements at the start, during the therapy to adjust the level of exercise and after the exercise program. | 6 | 5 | 7 |
| 54. to use regular and structured monitoring of therapy progression to strive for optimal exercise intensity.                                                | 6 | 5 | 7 |
| 55. to use regular and structured monitoring of therapy progression to adjust the intervention in case of therapy failure on an individual level.            | 6 | 5 | 6 |
| 56. to use regular and structure monitoring to therapy progression to identify and monitor adverse events.                                                   | 6 | 5 | 7 |
| <b>It is essential for the potential effectiveness of a therapeutic exercise program:</b>                                                                    |   |   |   |
| 57. that nutrition intake is controlled for (total calories, type and percent of calories).                                                                  | 3 | 2 | 4 |
| 58. that medication use is controlled for.                                                                                                                   | 5 | 4 | 6 |
| <b>It is essential for the potential effectiveness of a therapeutic exercise program:</b>                                                                    |   |   |   |
| 59. that positive improvements on the patient specific functional scale are achieved.                                                                        | 6 | 4 | 6 |
| 60. that there is a statistical significant outcome based on scientific description of exercise.                                                             | 5 | 4 | 6 |
| 61. that the outcomes of the exercise program are explained, based on a plausible rationale.                                                                 | 6 | 6 | 7 |
